# Supplementary material for: Revealing temperature-dependent polymer aggregation in solution with small-angle X-ray scattering
Source: Royal Society of Chemistry journal article supplement (doi:10.1039/d1ta09086k), 2022-01-01
Supplement: d1ta09086k1.pdf [file d1ta09086k1.pdf]

## Supporting Information

### Revealing Temperature-Dependent Polymer Aggregation in Solution with Small-Angle X-ray Scattering

*Maged Abdelsamie*<sup>1, 2†</sup>, *Thomas P. Chaney*<sup>3†</sup>, *Hongping Yan*<sup>1,4</sup>, *Sebastian A. Schneider*<sup>1,5</sup>, *I.*

*Alperen Ayhan*<sup>6</sup>, *Enrique D. Gomez*<sup>6,7</sup>, *John R. Reynolds*<sup>8</sup>, *Michael F. Toney*<sup>1, 3, 9\*</sup>

<sup>1</sup>Stanford Synchrotron Radiation Lightsource SLAC National Accelerator Laboratory Menlo Park, CA, 94025, USA

<sup>2</sup>Materials Sciences Division, Lawrence Berkeley National Laboratory, Berkeley, CA, 94720, USA

<sup>3</sup>Materials Science and Engineering, University of Colorado, Boulder, CO 80309, USA

<sup>4</sup>Department of Chemical Engineering, Stanford University, Stanford, CA, 94305 USA

<sup>5</sup>Department of Chemistry, Stanford University, Stanford, CA, 94305 USA

<sup>6</sup>Department of Chemical Engineering, The Pennsylvania State University, University Park, PA 16802, USA

<sup>7</sup>Department of Materials Science and Engineering, The Pennsylvania State University, University Park, PA, 16802, USA

<sup>8</sup>School of Chemistry and Biochemistry and School of Materials Science and Engineering, Center for Organic Photonics and Electronics, Georgia Tech Polymer Network, Georgia Institute of Technology, Atlanta, GA, 30332, USA

<sup>9</sup>Department of Chemical and Biological Engineering, University of Colorado, Boulder, CO 80309, USA

†Both authors contributed equally

\*E-mail: Michael.Toney@colorado.edu

# 1. Figures

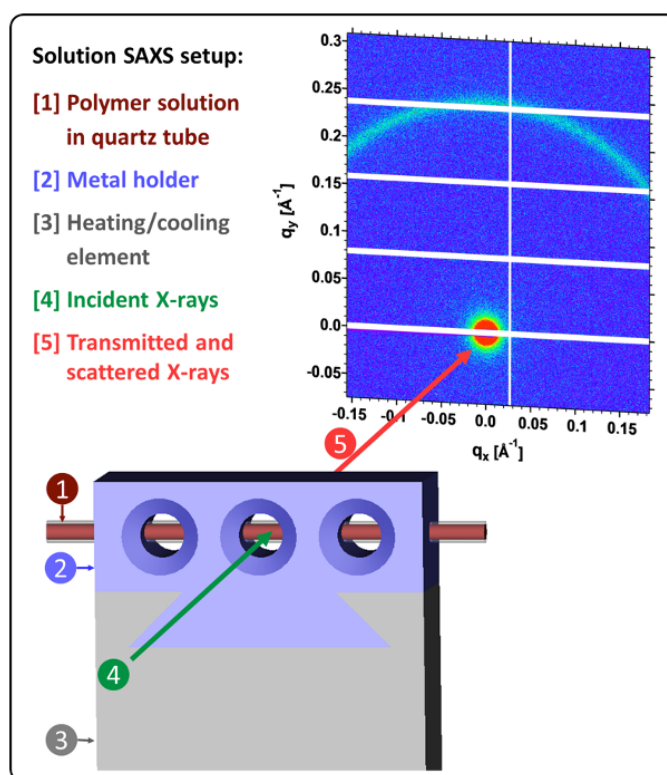

**Figure S1** Schematic representation of solution SAXS setup. The setup allows performing SAXS measurements at three-different fresh slots to avoid beam damage.

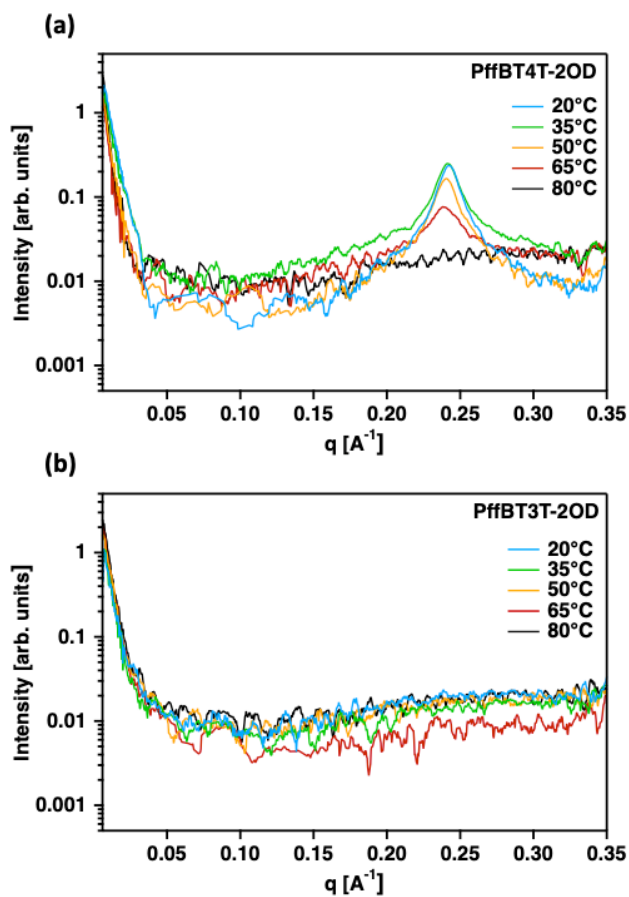

**Figure S2** Background-subtracted solution small-angle X-ray scattering (SAXS) profiles for PffBT4T-2OD and PffBT3T-2OD in a solvent mixture of oDCB: CB [1:1] at different temperatures in (a) and (b), respectively. At  $q > 0.02\text{\AA}^{-1}$  intensity values were smoothed with 10 point moving average to reduce the noise.

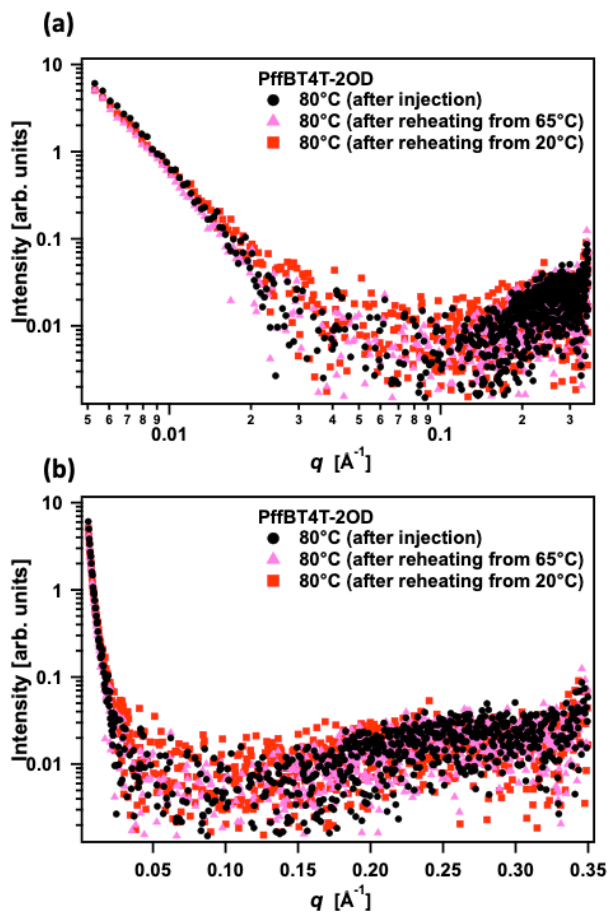

**Figure S3** Background-subtracted solution small-angle X-ray scattering (SAXS) profiles for PffBT4T-2OD in a solvent mixture of oDCB: CB [1:1] at 80 °C after injection (black) and after reheating from RT (red); (a) log-log plot, and (b) log-linear plot.

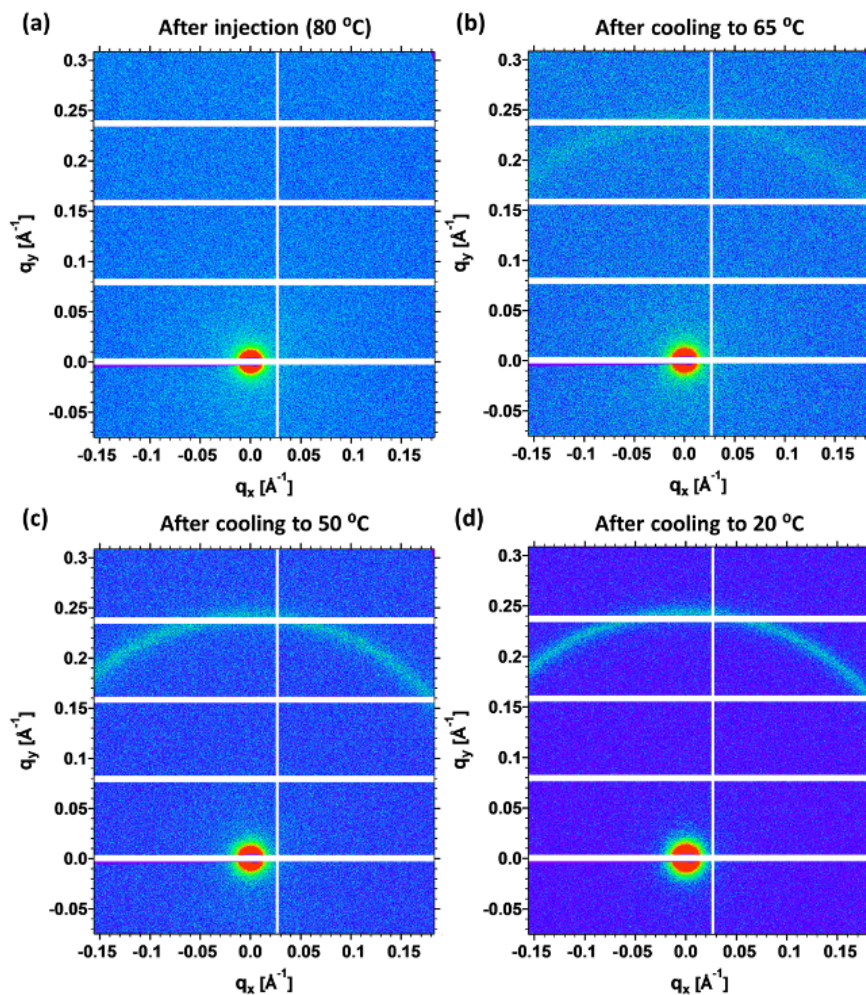

**Figure S4** Solution small-angle X-ray scattering (SAXS) images for PffBT4T-2OD solution in a solvent mixture of 1,2-Dichlorobenzene (oDCB): Chlorobenzene (CB) [1:1] at different temperatures; (a) 80 °C, (b) 65 °C, (c) 50 °C, and (d) 20 °C. The solution was injected into capillary at 80 °C and cooled down to 20 °C with data acquired during cooling.

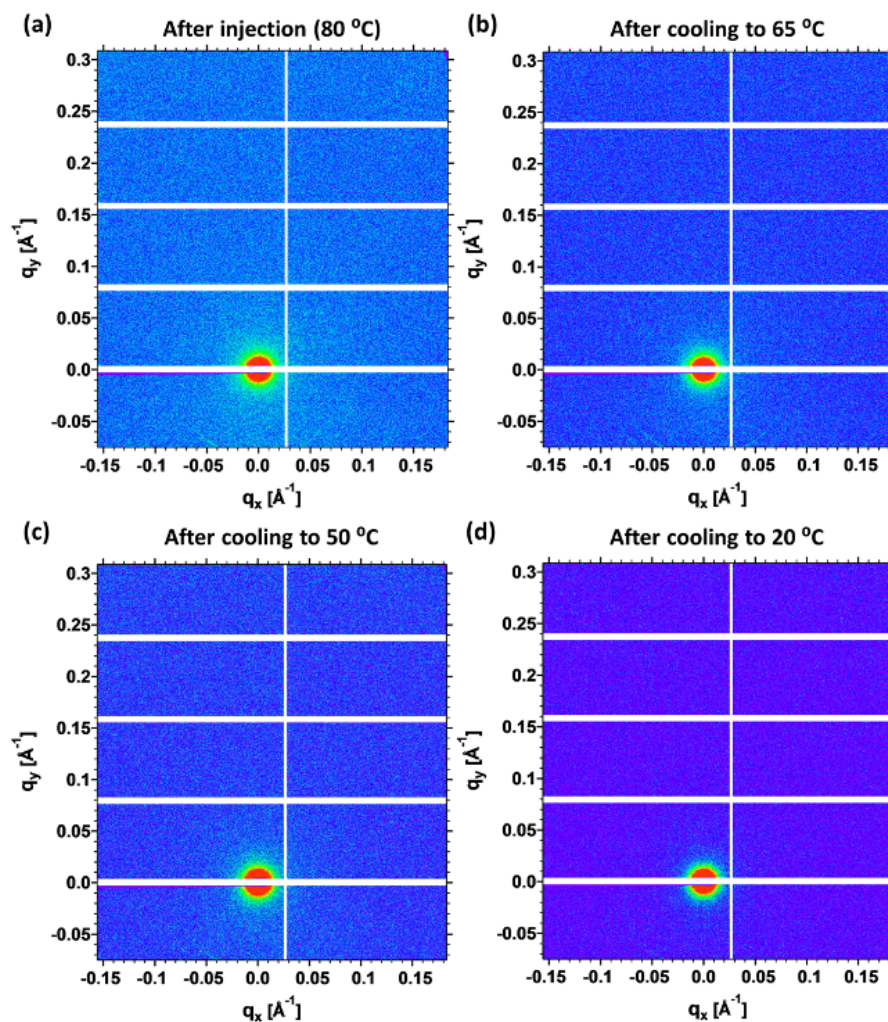

**Figure S5** Solution small-angle X-ray scattering (SAXS) images for PffBT3T-2OD solution in a solvent mixture of oDCB:CB [1:1] at different temperatures; (a) 80 °C, (b) 65 °C, (c) 50 °C, and (d) 20 °C. The solution was injected into capillary tube at 80 °C and cooled down to 20 °C with data acquired during cooling.

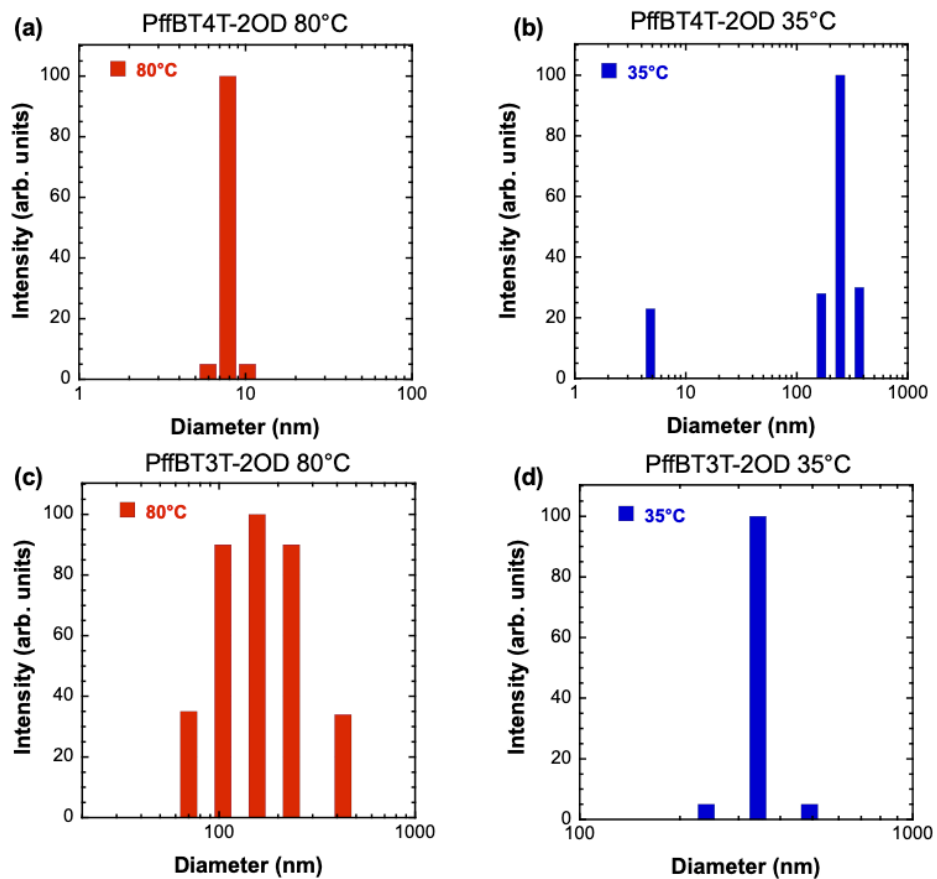

**Figure S6** Particle size distribution histograms from DLS measurements for PffBT4T-2OD (a-b) and PffBT3T-2OD (c-d) at 80 °C and 35 °C.

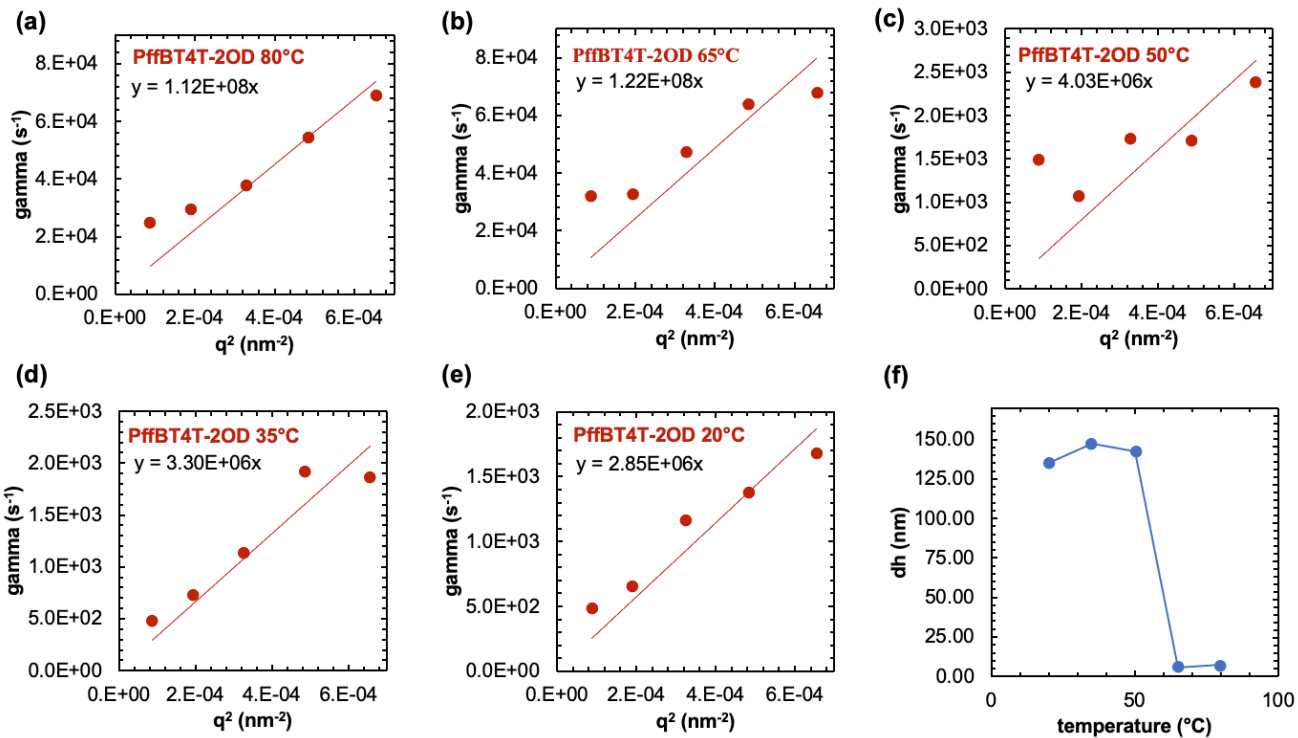

**Figure S7** (a-e) Plots of the dominant Gamma value against the scattering vector squared from DLS measurements of PffBT4T-2OD polymer solution as it was cooled. (f) shows the resulting hydrodynamic diameters calculated with Stokes-Einstein relationship using the translational diffusion coefficient gained from linear regression analysis of Gamma vs  $q^2$ .



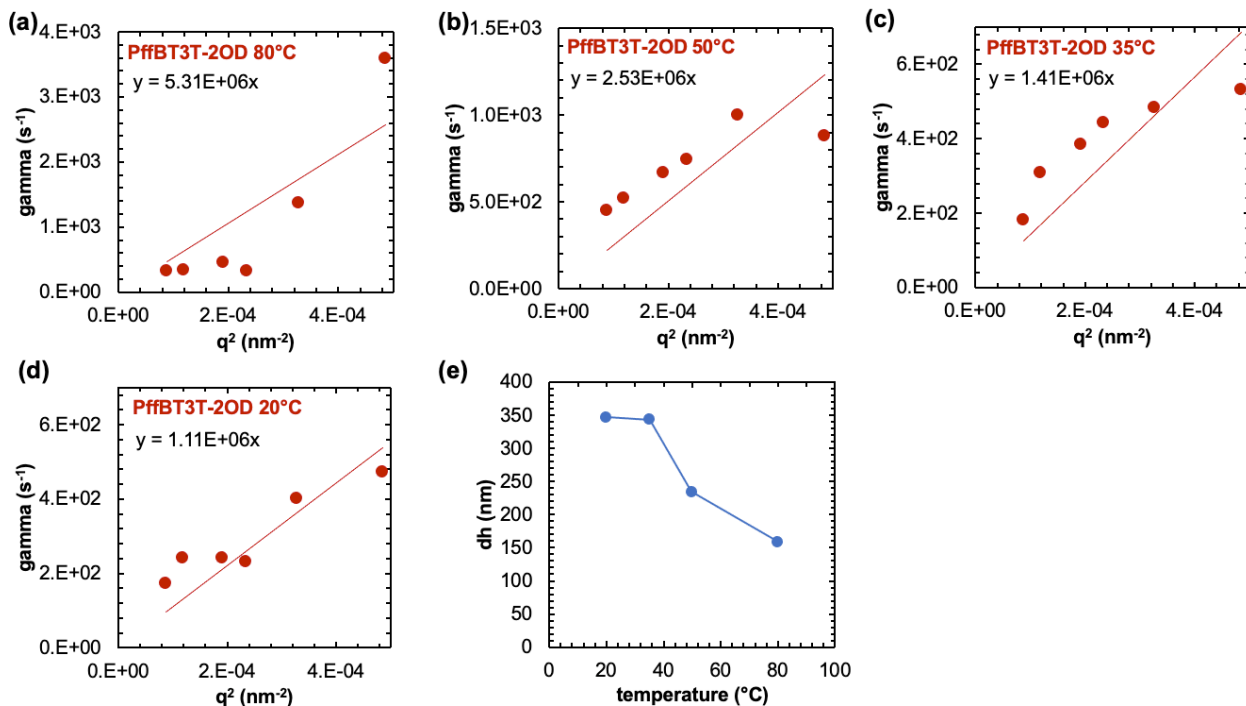

**Figure S8** (a-d) Plots of the dominant Gamma value against the scattering vector squared from DLS measurements of PffBT3T-2OD polymer solution as it was cooled. The 65 °C dataset was omitted due to measurement error. (e) shows the resulting hydrodynamic diameters calculated with Stokes-Einstein relationship using the translational diffusion coefficient gained from linear regression analysis of Gamma vs  $q^2$ .

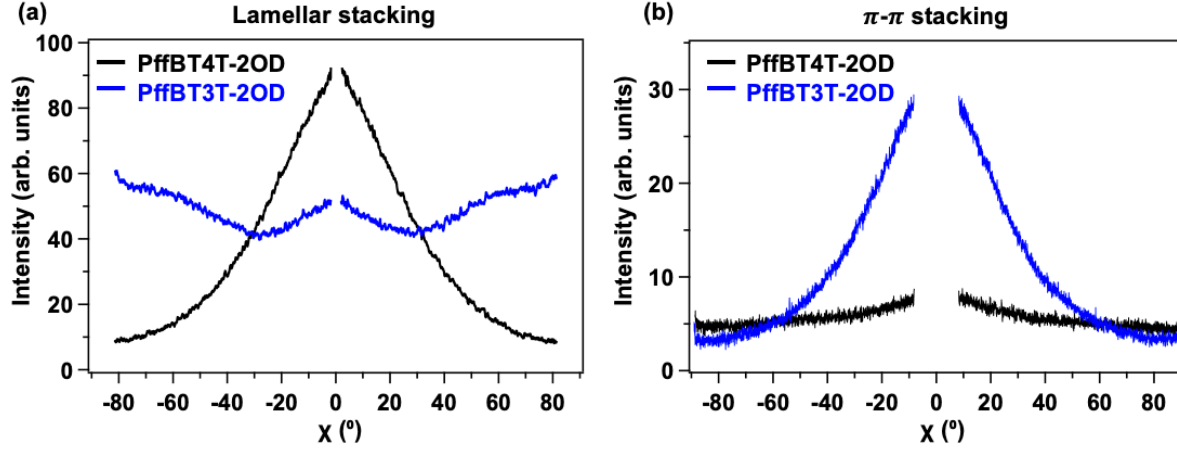

**Figure S9** Pole figures of the (100) lamellar stacking peak in (a) and (010)  $\pi$ - $\pi$  stacking peak in (b) for pristine films of PffBT4T-2OD [PffBT4T-2OD] (black) and PffBT3T-2OD (blue).

## 2. Equations

$$I(q) = G_i e^{\frac{q^2 R_{g,i}^2}{3}} + e^{\frac{q^2 R_{gco,i}^2}{3}} B_i \left\{ \frac{\left( \operatorname{erf}\left( \frac{q R_{g,i}}{\sqrt{6}} \right) \right)^3}{q} \right\}^{P_i} \quad (1)$$
